# Supplementary material
Source: publisher site journal article supplement (https://www.dovepress.com/article/309537)
Supplement: Supplementary file 2 [file 12_May_2021_Supplement_3_correcr_copy_3May2021.pdf › 12_May_2021_Supplement_3_correcr_copy_3May2021.pdf]

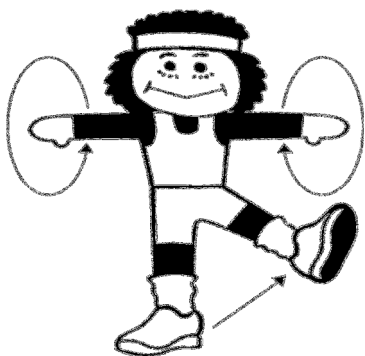

Please remember to try to complete your balance exercises **at least 3 times per week** for the next 6 months. Please place checkmarks to let us know if you have done your 3 sessions for the week indicated. If there is some reason why you were unable to complete your exercises as prescribed please describe it for us; for example, "Feeling unwell", "travelled out of town", etc. Remember to mail this postcard back to us each month along with your falls postcard. **Thank you!**

To:

---



---



---



---



---



---

MONTH \_\_\_\_\_ YEAR \_\_\_\_\_ STUDY ID # \_\_\_\_\_

| Week | First day                             | Second day                            | Third day                             |
|------|---------------------------------------|---------------------------------------|---------------------------------------|
| 1    | <input type="checkbox"/><br>Y N _____ | <input type="checkbox"/><br>Y N _____ | <input type="checkbox"/><br>Y N _____ |
| 2    | <input type="checkbox"/><br>Y N _____ | <input type="checkbox"/><br>Y N _____ | <input type="checkbox"/><br>Y N _____ |
| 3    | <input type="checkbox"/><br>Y N _____ | <input type="checkbox"/><br>Y N _____ | <input type="checkbox"/><br>Y N _____ |
| 4    | <input type="checkbox"/><br>Y N _____ | <input type="checkbox"/><br>Y N _____ | <input type="checkbox"/><br>Y N _____ |
| 5    | <input type="checkbox"/><br>Y N _____ | <input type="checkbox"/><br>Y N _____ | <input type="checkbox"/><br>Y N _____ |
