# Supplementary material
Source: publisher site journal article supplement (https://www.dovepress.com/article/309537)
Supplement: Supplementary file 3 [file 12_May_2021_Supplement_4_correct_copy_3May2021.pdf › 12_May_2021_Supplement_4_correct_copy_3May2021.pdf]

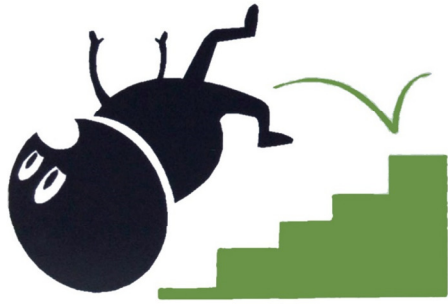

A **fall** is when you suddenly find yourself on the ground or a lower level without intending to be there. Please circle 'Y' or 'N' to indicate whether or not you have had a fall, including a slip or trip each day of this month and return this diary to West Park Healthcare Centre.

**If you have had a fall or other health related event, please call the Research Coordinator at:**

*(add sticker)*

To:

---

---

---

---

---

---

---

MONTH \_\_\_\_\_

YEAR \_\_\_\_\_

STUDY ID #: \_\_\_\_\_

| MON                      | TUES                     | WED                      | THURS                    | FRI                      | SAT                      | SUN                      |
|--------------------------|--------------------------|--------------------------|--------------------------|--------------------------|--------------------------|--------------------------|
| <input type="checkbox"/> |
| Y N                      | Y N                      | Y N                      | Y N                      | Y N                      | Y N                      | Y N                      |
| <input type="checkbox"/> |
| Y N                      | Y N                      | Y N                      | Y N                      | Y N                      | Y N                      | Y N                      |
| <input type="checkbox"/> |
| Y N                      | Y N                      | Y N                      | Y N                      | Y N                      | Y N                      | Y N                      |
| <input type="checkbox"/> |
| Y N                      | Y N                      | Y N                      | Y N                      | Y N                      | Y N                      | Y N                      |
| <input type="checkbox"/> |
| Y N                      | Y N                      | Y N                      | Y N                      | Y N                      | Y N                      | Y N                      |
